# Supplementary material for: A Theoretical Study of the Sensing Mechanism of a Schiff-Based Sensor for Fluoride
Source: MDPI journal article supplement (doi:10.3390/s22103958), 2022-05-23
Supplement: s1 [file s1]

## Supporting Information

# A Theoretical Study of the Sensing Mechanism of a Schiff-Based Sensor for Fluoride

Sha Ding <sup>1</sup>, Yong Xia <sup>1,2</sup>, Xiaoqi Lin <sup>1</sup>, Aokui Sun <sup>1</sup>, Xianggang Li <sup>1,\*</sup> and Yuejun Liu <sup>1,\*</sup>

<sup>1</sup> Key Laboratory of Advanced Packaging Materials and Technology of Hunan Province, Hunan University of Technology, Zhuzhou 412007, China; 421298314@163.com (S.D.); xiayong@hut.edu.cn (Y.X.);

af980808@163.com (X.L.); aksun@hut.edu.cn (A.S.)

<sup>2</sup> College of Chemistry and Chemical Engineering, Central South University, Changsha 410083, China

\* Correspondence: lixianggang@hut.edu.cn (X.L.); yjliu\_2005@126.com (Y.L.)

**Table S1.** Calculated key geometrical parameters for QP-F and QP-A by the DFT/TDDFT methods.

|                                                  | QP-F                 |                      | QP-A                 |                      |
|--------------------------------------------------|----------------------|----------------------|----------------------|----------------------|
|                                                  | S <sub>0</sub> state | S <sub>1</sub> state | S <sub>0</sub> state | S <sub>1</sub> state |
| Bond length (Å)                                  |                      |                      |                      |                      |
| O–H                                              | 1.237                | 1.172                |                      |                      |
| F–H                                              | 1.101                | 1.161                |                      |                      |
| Bond angle (°)                                   |                      |                      |                      |                      |
| O–H–F                                            | 177                  | 177                  |                      |                      |
| Dihedral angle (°)                               |                      |                      |                      |                      |
| C <sub>1</sub> –C <sub>2</sub> –N–C <sub>3</sub> | -177                 | -101                 | -177                 | -177                 |

**Table S2.** Calculated electronic transition energy for QP-A in acetonitrile at lc-BLYP/TZVP, PBE0/TZVP, HSE06/TZVP levels, and corresponding experimental values.

|              | Transition                      | Energy nm(eV) | <i>f</i> |
|--------------|---------------------------------|---------------|----------|
| lc-BLYP/TZVP | S <sub>1</sub> → S <sub>0</sub> | 407 (3.05)    | 0.6131   |
| PBE0/TZVP    | S <sub>1</sub> → S <sub>0</sub> | 583 (2.12)    | 0.4619   |
| HSE06/TZVP   | S <sub>1</sub> → S <sub>0</sub> | 582 (2.13)    | 0.2930   |
| Experiment   |                                 | 389           |          |
| lc-BLYP/TZVP | S <sub>0</sub> → S <sub>1</sub> | 338 (3.66)    | 0.6496   |
| PBE0/TZVP    | S <sub>0</sub> → S <sub>1</sub> | 432 (2.87)    | 0.2235   |
| HSE06/TZVP   | S <sub>0</sub> → S <sub>1</sub> | 456 (2.72)    | 0.1575   |
| Experiment   |                                 | 433           |          |

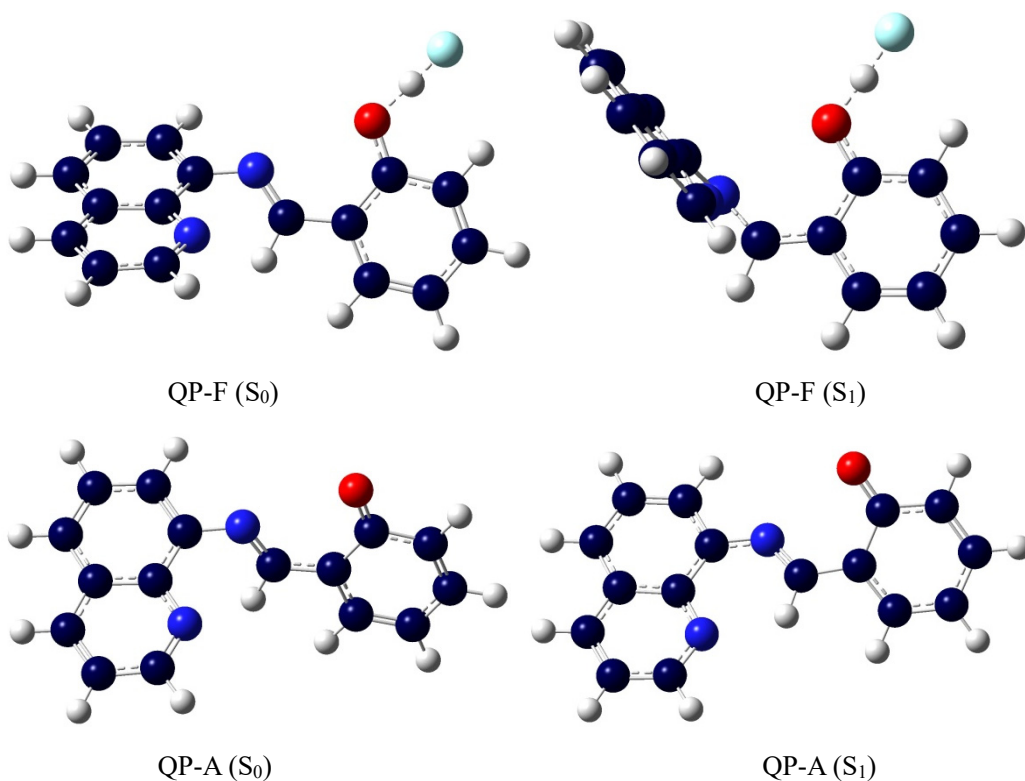

**Figure S1.** Optimized geometries of QP-F and QP-A in the  $S_0$  and  $S_1$  states.

#### Intramolecular hydrogen bond (IHB) interaction

A visual method in real-space surfaces [1], plots of the reduced density gradient (RDG) versus the electron density ( $\rho$ ) multiplied by the sign of the second Hessian eigenvalue ( $\lambda_2$ ), is adopted to clearly analyze the types and intensities of IHB interactions. The y-coordinate RDG and the x-coordinate  $\Omega$  are expressed as Equation (1) and Equation (2), respectively.

$$RDG = \frac{1}{2(3\pi^2)^{1/3}} \frac{|\nabla\rho|}{\rho^{4/3}} \quad (1)$$

$$\Omega = \text{sign}(\lambda_2)\rho \quad (2)$$

According to Bader's atoms-in-molecules (AIM) theory [2], the sign of the second Hessian eigenvalue  $\lambda_2 < 0$  and  $\lambda_2 > 0$  represent bonded and non-bonded interactions, respectively. Thus, combined with the electron density  $\rho$ , we can qualitatively determine the types and intensities of the interactions. Large, negative values of  $\text{sign}(\lambda_2)\rho$  are indicated attractive interactions (such as hydrogen bonding or dipole-dipole); while if the values are large and positive, the interactions are steric crowding. Values neighboring zero represent very weak, van der Waals interactions. The colored RDG scatter plots are constructed by Mulitiwfn [3], and colored RDG isosurfaces are obtained by VMD software [4].

- [1] Johnson, E.R.; Keinan, S.; Mori-Sanchez, P.; Contreras-Garcia, J.; Cohen, A.J.; Yang, W. Revealing noncovalent interactions. *J. Am. Chem. Soc.* **2010**, *132*, 6498–6506.
- [2] Bader, R.F.W. A quantum theory of molecular structure and its applications. *Chem. Rev.* **1991**, *91*, 893–928.
- [3] Lu, T.; Chen, F. Multiwfn: A multifunctional wavefunction analyzer. *J. Comput. Chem.* **2012**, *33*, 580–592.
- [4] Humphrey, W.; Dalke, A.; Schulten, K. VMD: Visual molecular dynamics. *J. Mol. Graph. Model.* **1996**, *14*, 33–38.
